# Supplementary material for: Bacterial ribonuclease binase exerts an intra-cellular anti-viral mode of action targeting viral RNAs in influenza a virus-infected MDCK-II cells
Source: PubMed Central journal article supplement (PMC5756404; doi:10.1186/s12985-017-0915-1), 2018-01-05

**Supplementary Figure (S1)**

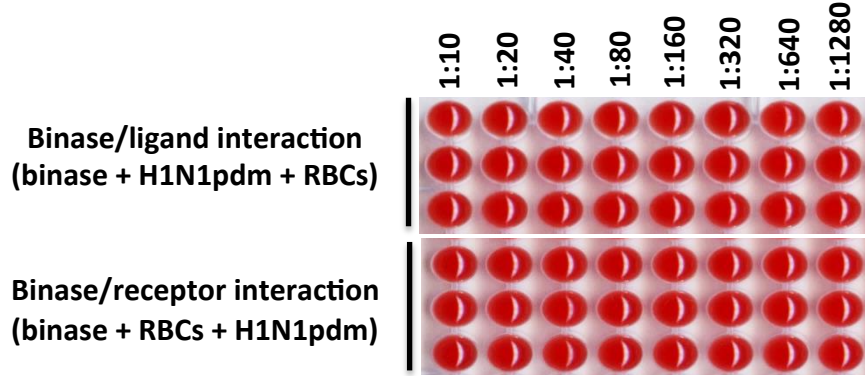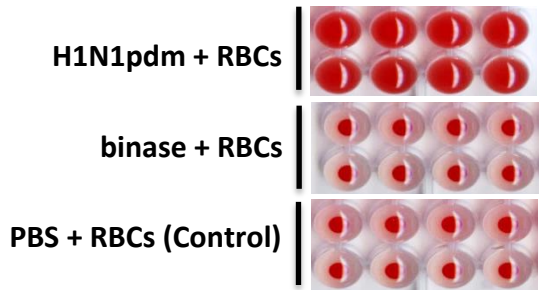

Supplement: 12985_2017_915_MOESM1_ESM.pdf [file 12985_2017_915_MOESM1_ESM.pdf]
